# Supplementary material
Source: PubMed Central journal article supplement (PMC4142827)
Supplement: NIHMS619256-supplement-01.pdf [file NIHMS619256-supplement-01.pdf]

**Figure S1: TCR $\alpha\beta$  chains are expressed in cell lines and efficiently cleaved *in vitro* and *in vivo* (related to Figure 1).**

**A**

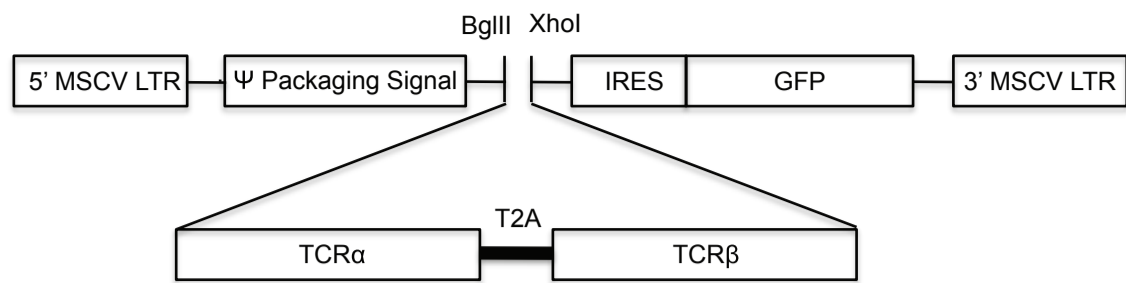

**B**

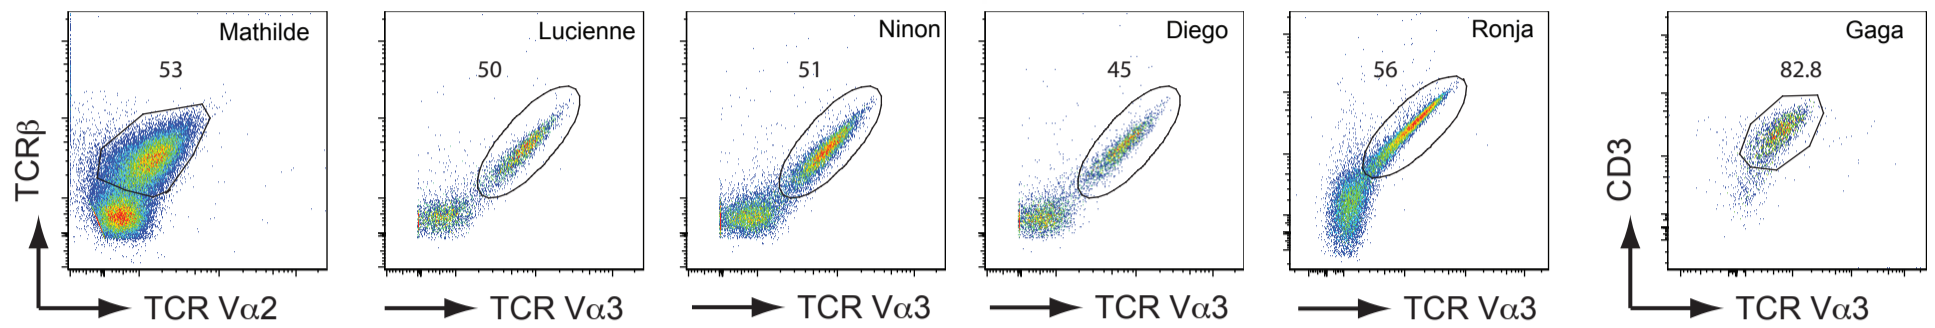

**C**

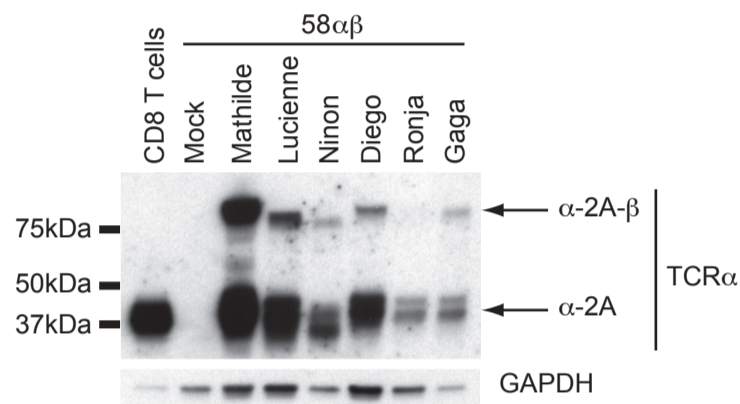

**D**

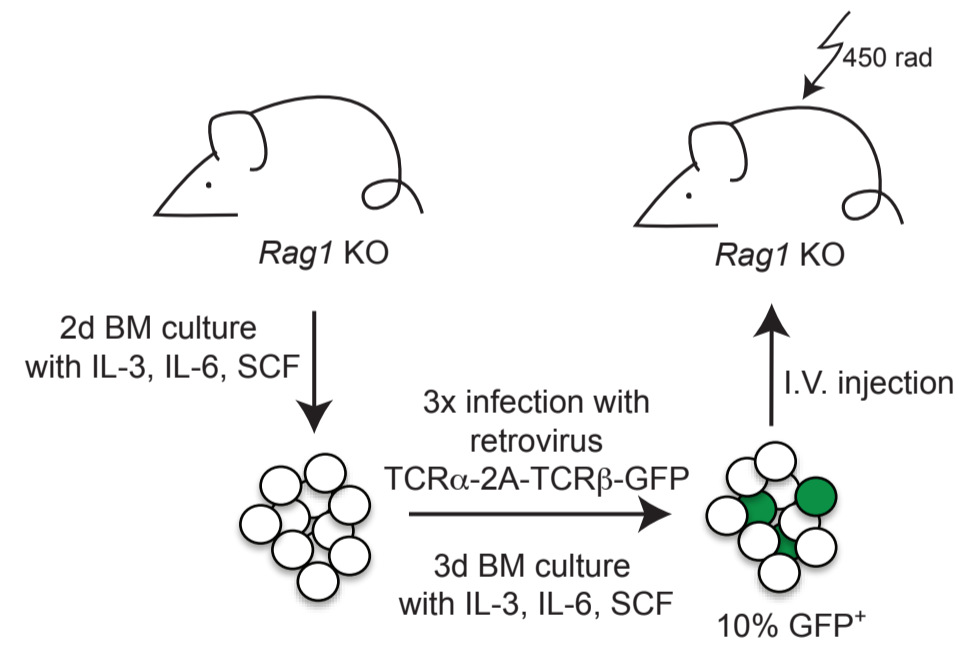

**E**

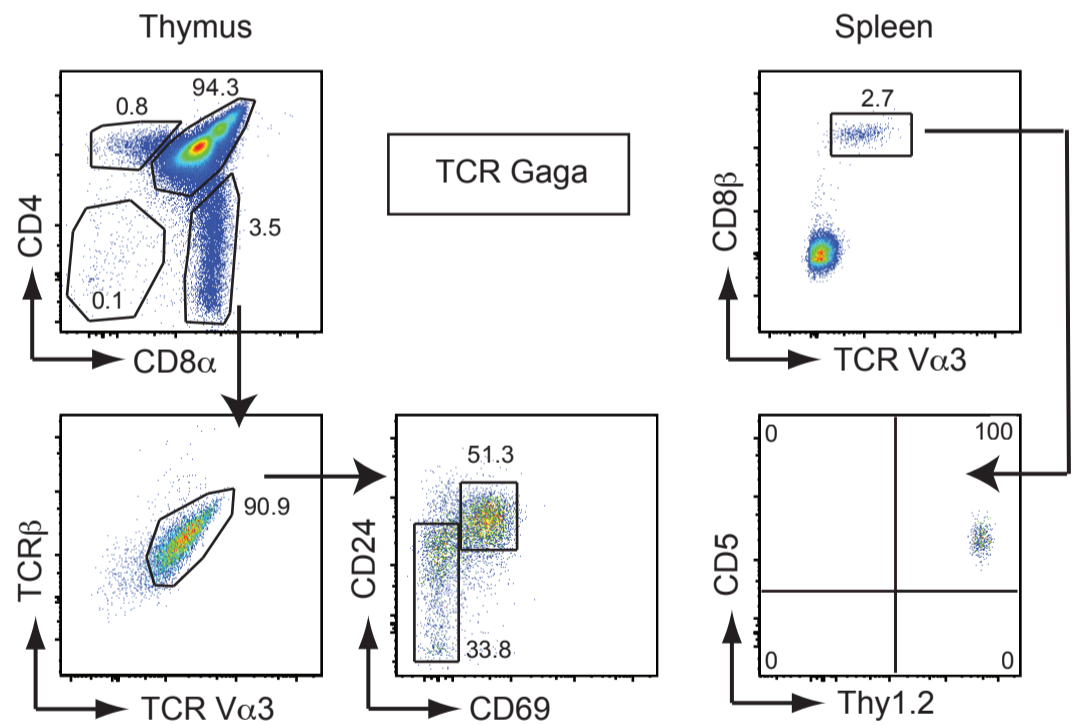

**Figure S1. TCR $\alpha\beta$  chains are expressed in cell lines and efficiently cleaved *in vitro* and *in vivo* (related to Figure 1).** (A) Illustration of the retroviral vector and 2A-linked TCR constructs used. The MSC long terminal repeat promoter was used to express the 2A-linked construct. The IRES directs translation of GFP. Key restriction sites used for cloning are indicated. MSCV, Murine Stem Cell Virus; T2A, 2A regions of the *Thosea Asigna* virus. (B) 58 $\alpha\beta$ <sup>+</sup> cells were transiently transfected with plasmids carrying the 2A-linked TCR $\alpha\beta$  chains from each clone, as indicated, stained with anti-TCR $\beta$ , anti-TCR V $\alpha$ 2, anti-TCR V $\alpha$ 3 or anti-CD3, and analysed by flow cytometry. (C) 58 $\alpha\beta$ <sup>+</sup> cells transfected as described in (B) were lysed and the lysates were resolved by SDS-PAGE. Membranes were probed with anti-TCR $\alpha$  and anti-GAPDH antibodies. Cells transduced with empty vector and sorted CD8<sup>+</sup> T cells were used as negative and positive controls, respectively. (D) Schematic representation of the procedure for generation of retroviral bone marrow chimeras. BM, bone marrow; d, days; IL, interleukin; SCF, Stem Cell Factor. (E) FACS analysis of GFP<sup>hi</sup> thymocytes (left panels) and splenocytes (right panels) from *Rag1*<sup>-/-</sup> chimeras expressing TCR Gaga isolated from a CD8 $\alpha\beta$ <sup>+</sup> TCR $\alpha\beta$ <sup>+</sup> intraepithelial T cells and analysed 28 days post reconstitution. Representative plots are shown from two independent experiments ( $n=4$ ). The genes for the  $\beta$ -chain of TCR Gaga are TRBV13-1, TRBD1, TRBJ1-1 and the sequence for the CDR3 is CASSEGQDTEVFF. The genes for the  $\alpha$ -chain of TCR Gaga are TRAV9N-3, TRAJ5 and the sequence for the CDR3 is CAVSRPQVVGQLTF.

**Figure S2: DN TCR $\alpha\beta$ <sup>+</sup> T splenocytes harbour the potential to migrate to the small intestine (related to Figure 2).**

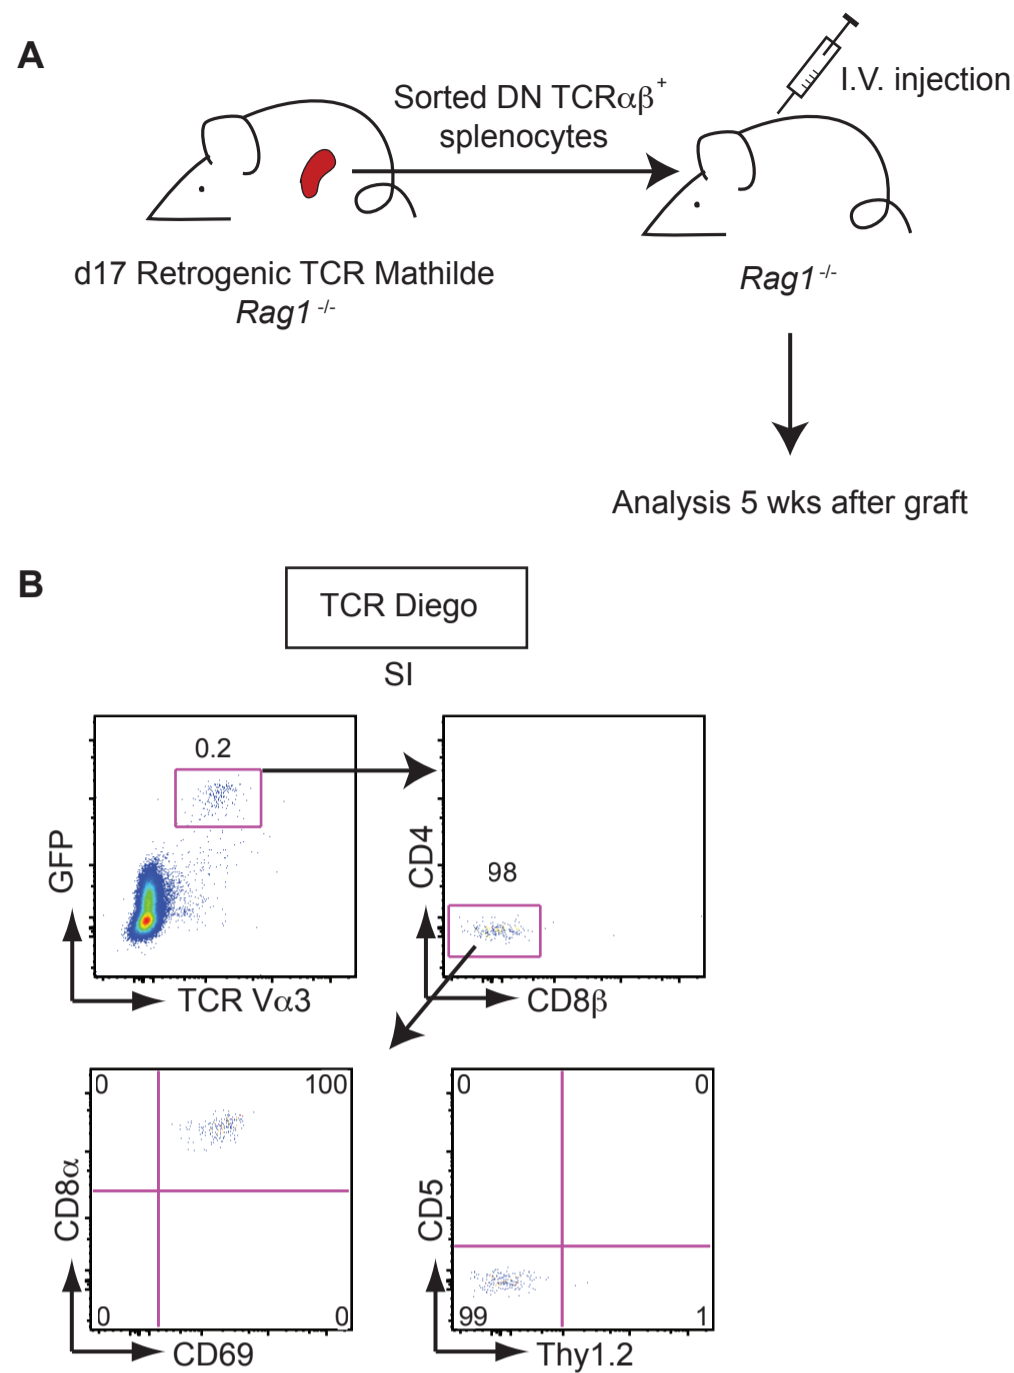

**Figure S2. DN TCR $\alpha\beta$ <sup>+</sup> T splenocytes harbour the potential to migrate to the small intestine (related to Figure 2).** (A) Schematic representation of the experimental set-up. (B) Sorted GFP<sup>+</sup> DN TCR $\alpha\beta$  splenocytes isolated from retrogenic donor mice were adoptively transferred to *Rag1*<sup>-/-</sup> recipients. Representative flow cytometry plots of GFP<sup>+</sup> intraepithelial T cells from chimeras injected with GFP<sup>+</sup> DN TCR $\alpha\beta$  Diego splenocytes and analysed five weeks post-transfer. Two independent experiments were performed for each TCR, TCR Mathilde (*n*=2) and TCR Diego (*n*=2).

**Figure S3: DN TCRαβ<sup>+</sup> T cells develop in a competitive mix BM chimera set-up (related to Figure 2).**

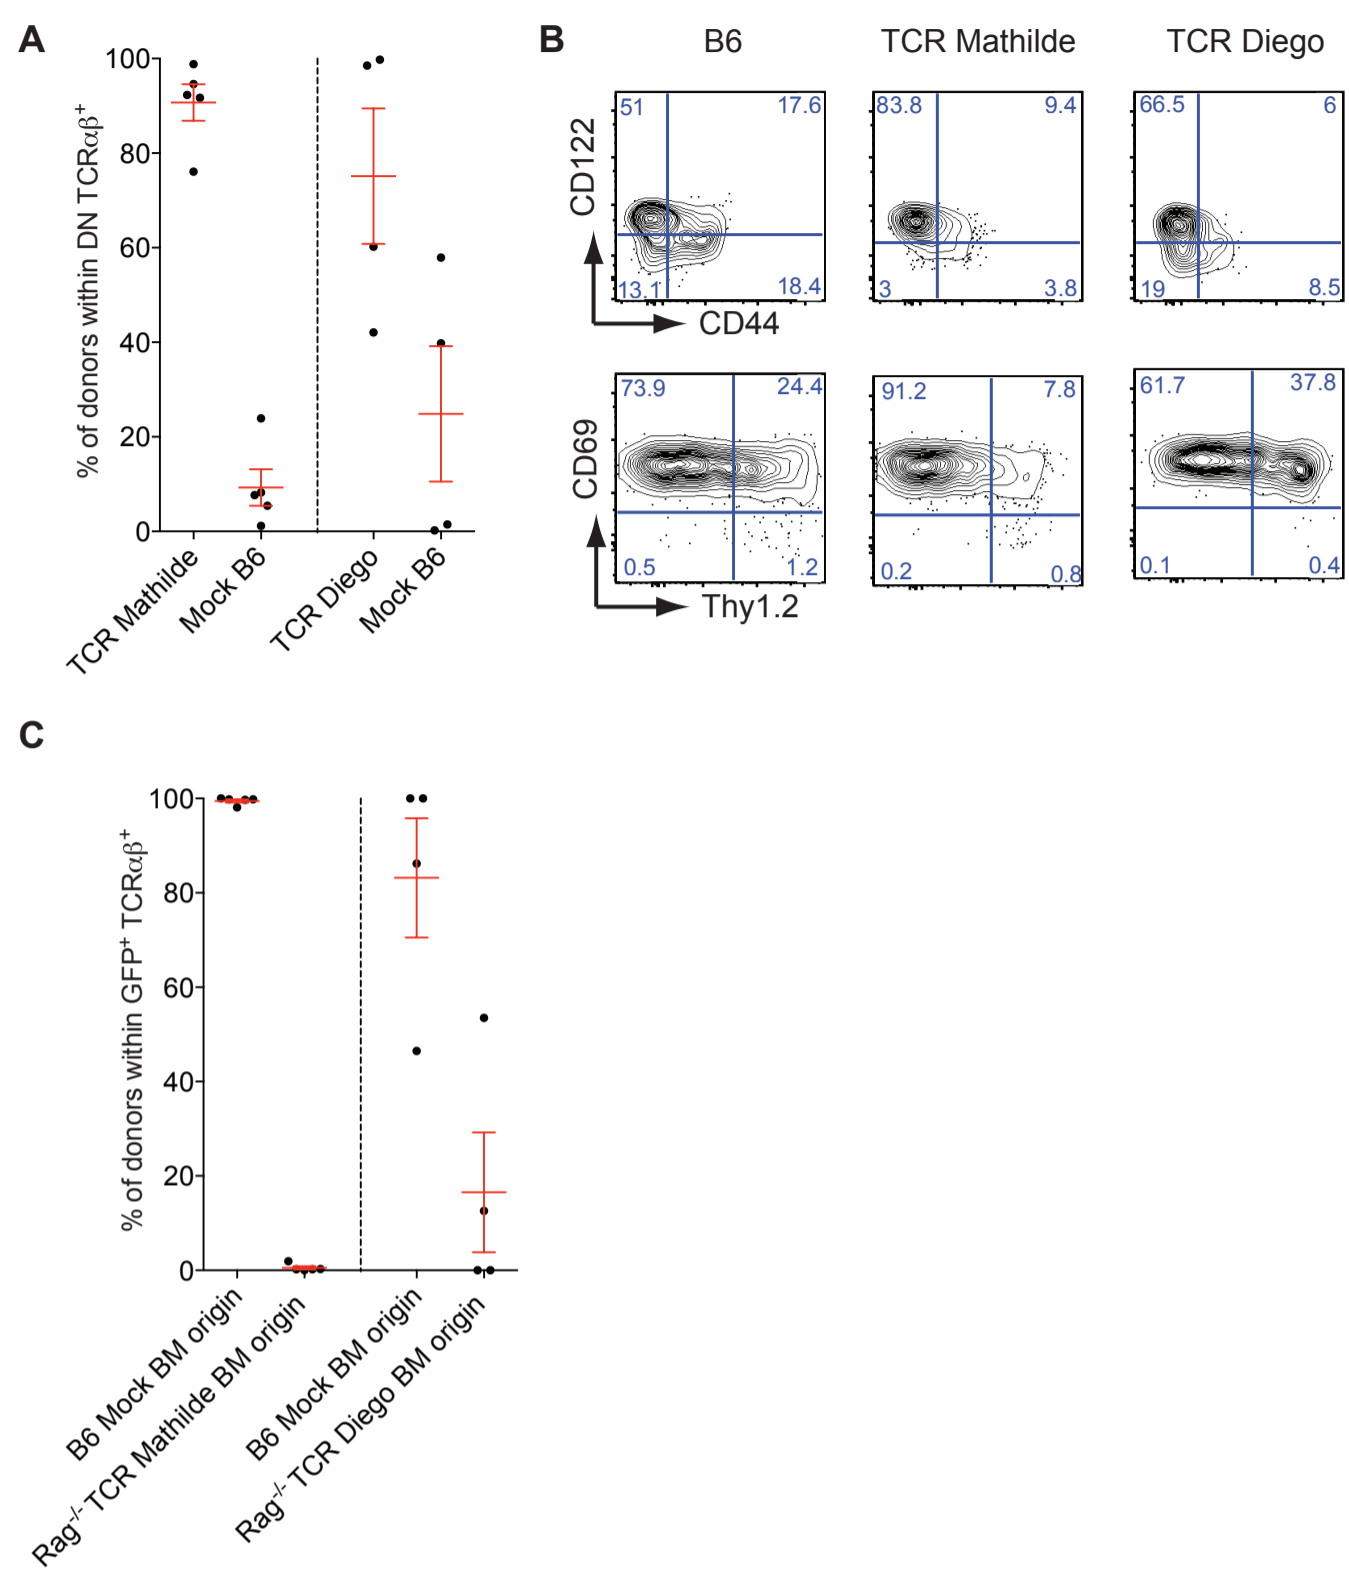

**Figure S3. DN TCRαβ<sup>+</sup> T cells develop in a competitive mix BM chimera set-up (related to Figure 2).** An equal number of B6 Ly5.1<sup>+</sup> BM cells transduced with Mock vector and *Rag1*<sup>-/-</sup> Ly5.2<sup>+</sup> BM cells transduced with either TCR-Mathilde or TCR-Diego were injected in irradiated *Rag1*<sup>-/-</sup> recipient and analysed five weeks post-transfer. (A) Graph represents the percentage of Ly5.1<sup>-</sup> DN TCRαβ<sup>+</sup> cell expressing TCR-Mathilde or TCR-Diego and Ly5.1<sup>+</sup> DN TCRαβ<sup>+</sup> cell from B6 in gated GFP<sup>+</sup> DN TCRαβ<sup>+</sup> intraepithelial T cells from the competitive mix BM chimera. (B) Representative dot plots showing CD122 versus CD44 and CD69 versus Thy1.2 expression on DN TCRαβ<sup>+</sup> intraepithelial T cells from B6 WT or mix BM chimera. (C). Graph represents the percentage of B6 Ly5.1<sup>+</sup> versus *Rag1*<sup>-/-</sup> Ly5.2<sup>+</sup> BM cells within GFP<sup>+</sup> Thy1.2<sup>+</sup> CD5<sup>+</sup> gated splenocytes isolated from the competitive mix BM chimera. Two independent experiments were performed for each TCR, TCR Mathilde (*n*=5) and TCR Diego (*n*=4).

**Figure S4: CD69 expression on thymocyte subsets (related to Figure 3).**

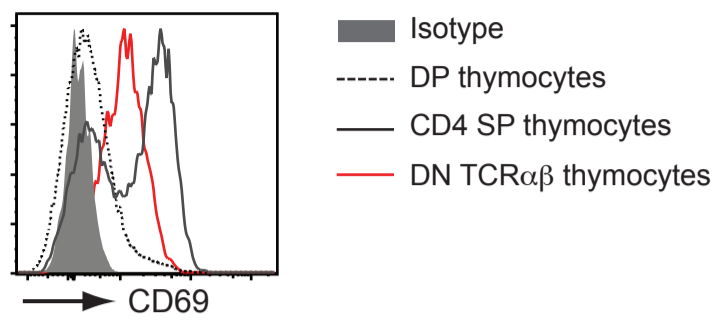

**Figure S4. CD69 expression on thymocyte subsets (related to Figure 3).**

Expression of CD69 on B6 CD4 SP, B6 DP and DN TCR $\alpha\beta$ <sup>+</sup> Nino thymocytes.

Representative graphs from 2 mice. Similar results were obtained in chimera

**Figure S5: DN TCRαβ<sup>+</sup> T cells are not Qa1-, TL- or CD1d-restricted T cells (related to Figure 5).**

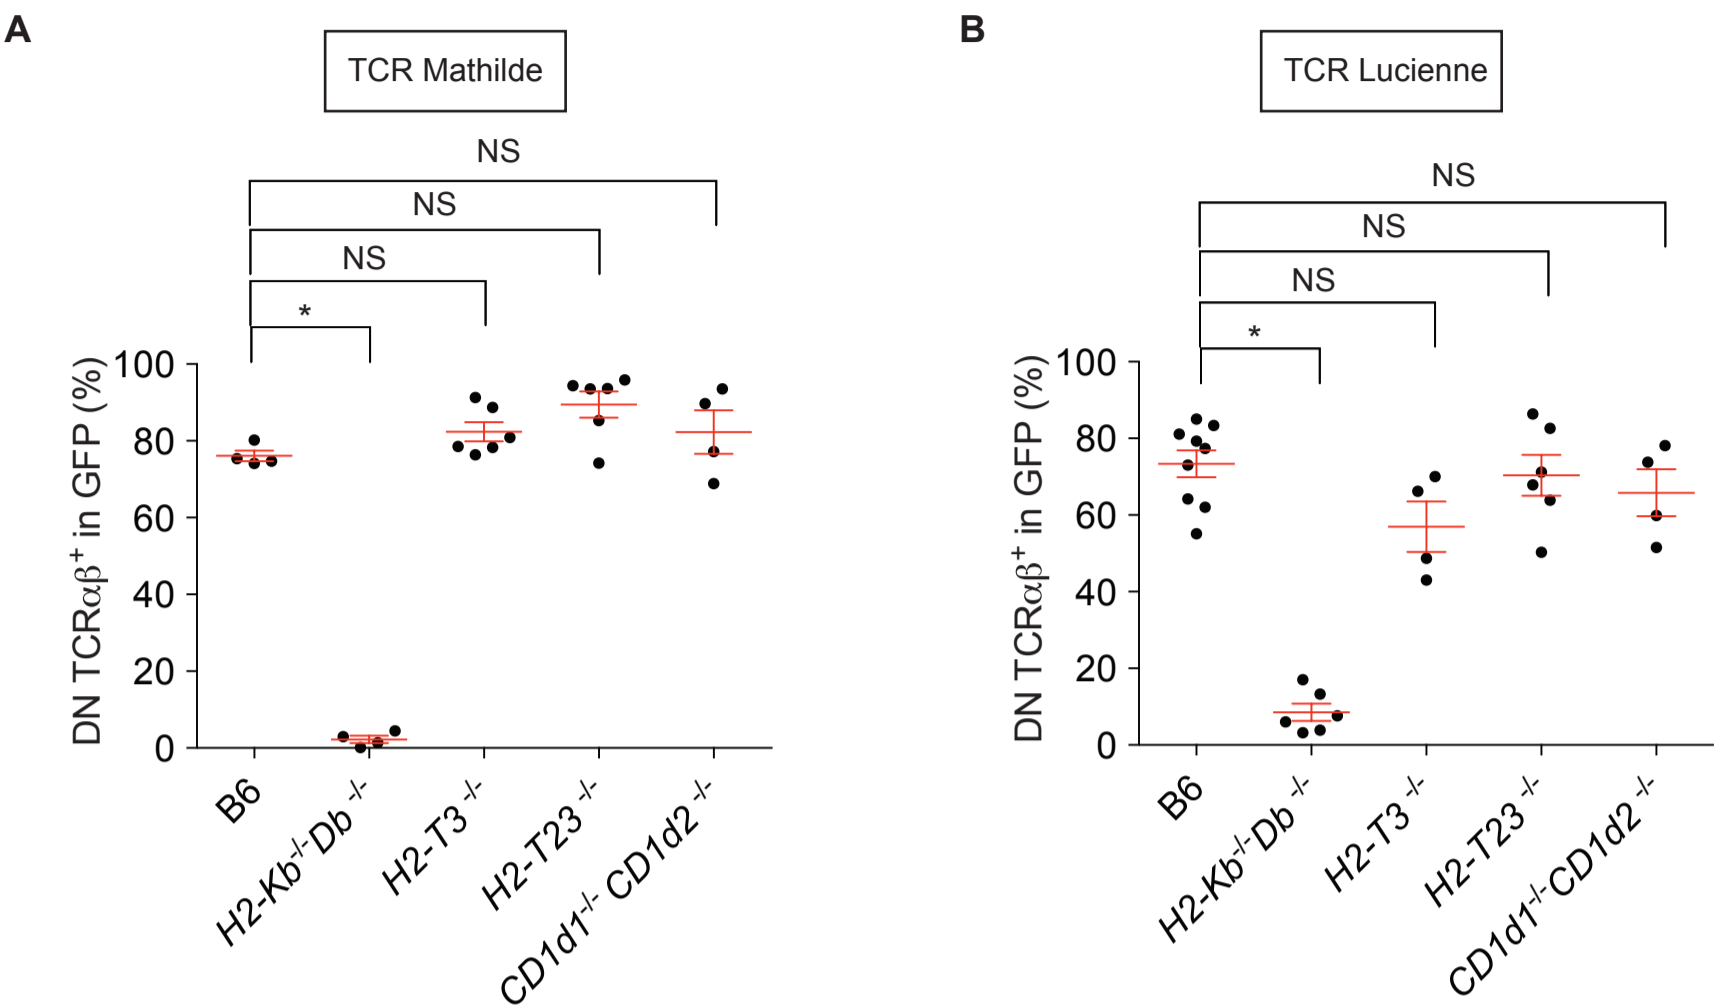

**Figure S5. DN TCRαβ<sup>+</sup> T cells are not Qa1-, TL- or CD1d-restricted T cells (related to Figure 5).** Frequency of DN TCRαβ<sup>+</sup> T cells in GFP<sup>+</sup> gated intraepithelial T cells isolated from chimeric recipients deficient for the indicated MHC class I molecules. Recipients were analysed five weeks after reconstitution. (A) Analysis of chimera expressing TCR Mathilde from at least two independent experiments (B6 (n=4), *H2-Kb<sup>-/-</sup>Db<sup>-/-</sup>* (n=5), *H2-T3<sup>-/-</sup>* (n=6), *H2-T23<sup>-/-</sup>* (n=6) and *CD1d1<sup>-/-</sup>CD1d2<sup>-/-</sup>* (n=4)). (B) Analysis of chimera expressing TCR Lucienne from at least two independent experiments (B6 (n=9), *H2-Kb<sup>-/-</sup>Db<sup>-/-</sup>* (n=6), *H2-T3<sup>-/-</sup>* (n=4), *H2-T23<sup>-/-</sup>* (n=6) and *CD1d1<sup>-/-</sup>CD1d2<sup>-/-</sup>* (n=4)). Data points are shown for each mouse, with mean plus s.e.m. A two-tailed Mann-Whitney test was performed. \* *P* < 0.05 and NS, not significant.

Figure S6: Table summarizing the TCR specificity for each clone analysed (related to Figure 5 and Figure 6).

| Clone<br>Mouse Line                                         | Mathilde                                                        | Lucienne | Diego                                                                                                                                                                                                        | Ronja | Ninon                                                                              |
|-------------------------------------------------------------|-----------------------------------------------------------------|----------|--------------------------------------------------------------------------------------------------------------------------------------------------------------------------------------------------------------|-------|------------------------------------------------------------------------------------|
| B6                                                          | Yes                                                             | Yes      | Yes                                                                                                                                                                                                          | Yes   | Yes                                                                                |
| <i>H2-Kb<sup>-/-</sup> Db<sup>-/-</sup></i>                 | No                                                              | No       | Yes                                                                                                                                                                                                          | Yes   | Yes                                                                                |
| <i>H2-T3<sup>-/-</sup></i>                                  | Yes                                                             | Yes      | Yes                                                                                                                                                                                                          | Yes   | Yes                                                                                |
| <i>CD1d1<sup>-/-</sup> CD1d2<sup>-/-</sup></i> (Chr. 3)     | Yes                                                             | Yes      | Yes                                                                                                                                                                                                          | Yes   | Yes                                                                                |
| <i>H2-T23<sup>-/-</sup></i>                                 | Yes                                                             | Yes      | Yes                                                                                                                                                                                                          | Yes   | Yes                                                                                |
| <i>Mr1<sup>-/-</sup></i> (Chr. 1)                           | N.D.                                                            | N.D.     | Yes                                                                                                                                                                                                          | Yes   | Yes                                                                                |
| <i>Fcgrt<sup>-/-</sup></i> (Chr. 7)                         | N.D.                                                            | N.D.     | N.D.                                                                                                                                                                                                         | N.D.  | Yes                                                                                |
| <i>Hfe<sup>-/-</sup></i> (Chr. 13)                          | N.D.                                                            | N.D.     | N.D.                                                                                                                                                                                                         | N.D.  | Yes                                                                                |
| BALB/cJ ( <i>H2-Qa2<sup>+</sup></i> )                       | N.D.                                                            | N.D.     | No                                                                                                                                                                                                           | No    | Yes                                                                                |
| BALB/c ByJ ( <i>H2-Qa2<sup>null</sup></i> )                 | N.D.                                                            | N.D.     | No                                                                                                                                                                                                           | No    | Yes                                                                                |
| B6.C-H2 <sup>d</sup> /bByJ ( <i>H2-Qa2<sup>null</sup></i> ) | N.D.                                                            | N.D.     | No                                                                                                                                                                                                           | No    | Yes                                                                                |
| <i>Tap1<sup>-/-</sup></i>                                   | Yes                                                             | Yes      | No                                                                                                                                                                                                           | No    | Yes                                                                                |
| Conclusions                                                 | K <sup>b</sup> D <sup>b</sup> restricted<br><br>TAP independent |          | Restricted to an MHC-Ib molecule from the H2-Q or H2-T or H2-M regions (other than the one tested) and that differ between B6 and Balb/c backgrounds and is localized on chromosome 17.<br><br>TAP dependent |       | Restricted to an MHC-Ib molecule other than the one tested.<br><br>TAP independent |

Figure S6. Table summarizing the TCR specificity for each clone analysed (related to Figure 5 and Figure 6). “Yes” indicates the presence of DN TCRαβ<sup>+</sup> intraepithelial T cells and “No” the absence of DN TCRαβ<sup>+</sup> intraepithelial T cells. In mice, the MHC locus is localised on chromosome (Chr.) 17 with a few MHC molecules localised on other chromosomes as indicated.

**Table S1. TCR $\beta$  and TCR $\alpha$  sequences of five individual DN TCR $\alpha\beta^+$  intraepithelial T cells isolated from C57BL/6 mice (related to Figure 1).**

| TCR Name           | TCR $\beta$ chain |                   |                   |                           | TCR $\alpha$ chain |                    |                           |
|--------------------|-------------------|-------------------|-------------------|---------------------------|--------------------|--------------------|---------------------------|
|                    | V $\beta$ segment | D $\beta$ segment | J $\beta$ segment | CDR3 amino-acid sequences | V $\alpha$ segment | J $\alpha$ segment | CDR3 amino-acid sequences |
| Mathilde hybridoma | TRBV5             | TRBD2             | TRBJ2-3           | CASSQEDWGPSAETLYF         | TRAV14-2           | TRAJ48             | CAAQANYGNEKITF            |
| Lucienne           | TRBV16            | TRBD1             | TRBJ1-2           | CASSPGQANSDYTF            | TRAV9N-3           | TRAJ23             | CAVRNYNQGKLIF             |
| Diego              | TRBV16            | TRBD1             | TRBJ2-4           | CASSSPGQGASQNTLYF         | TRAV9N-3           | TRAJ58             | CAVKGTGSKLSF              |
| Ronja              | TRBV16            | TRBD1             | TRBJ2-7           | CASSLDRISYEYF             | TRAV9N-3           | TRAJ35             | CAVRTGFASALTF             |
| Ninon              | TRBV16            | TRBD2             | TRBJ2-7           | CASSKRLGAYEQYF            | TRAV9N-3           | TRAJ12             | CAVSMGTGGYKVVF            |
